# Supplementary material for: Can Citizen Science Contribute to Avian Influenza Surveillance?
Source: MDPI journal article supplement (doi:10.3390/pathogens12091183), 2023-09-20
Supplement: s1 [file s1]

## Supplementary material

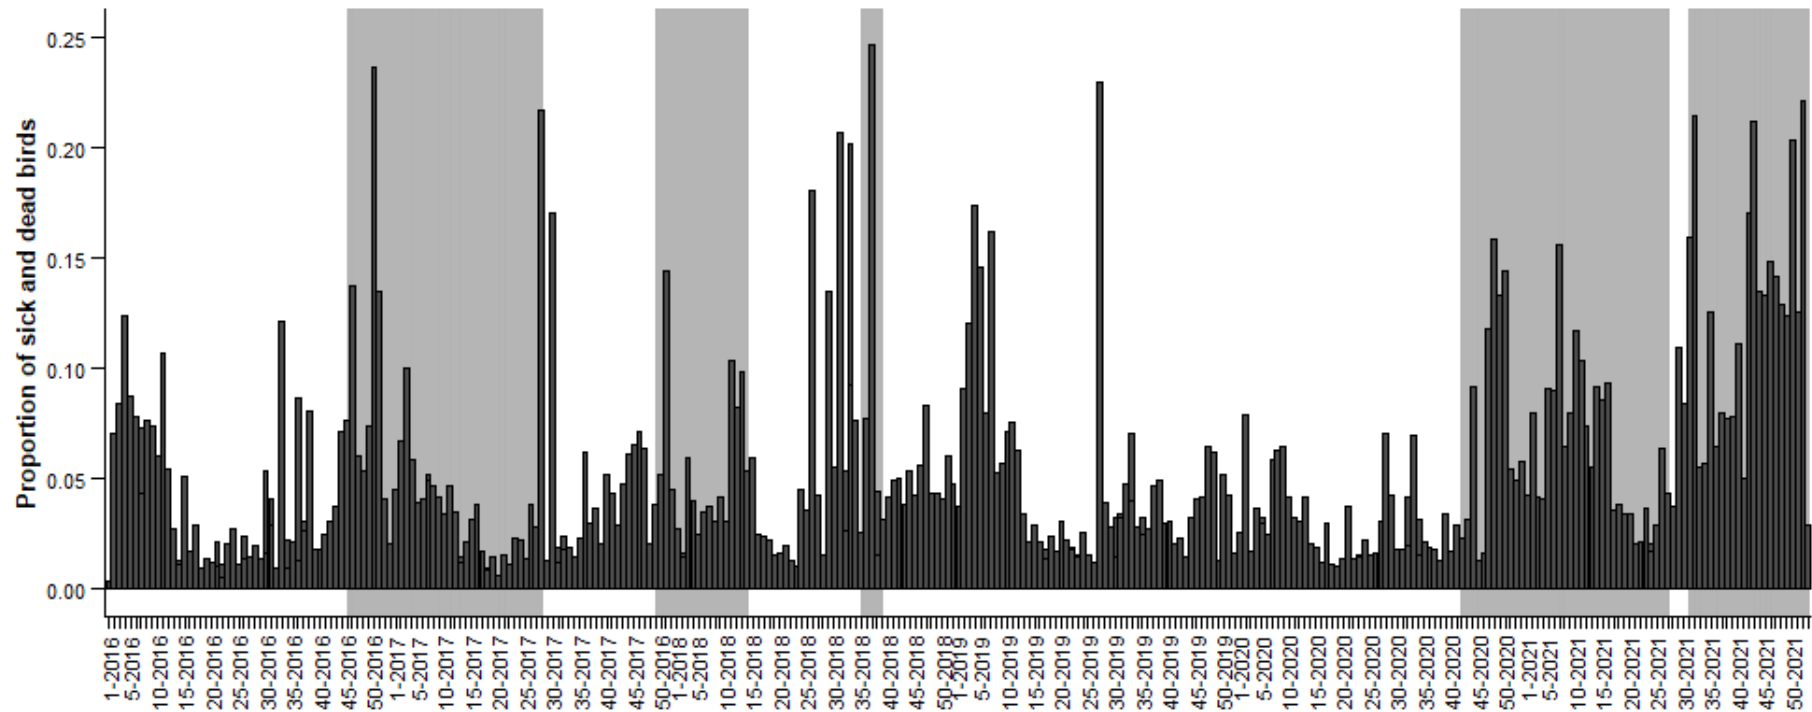

**Figure S1.** Temporal variation in the proportion of sick and dead birds by week (dark grey bars) and the periods of officially reported AIV outbreaks (light grey bars).

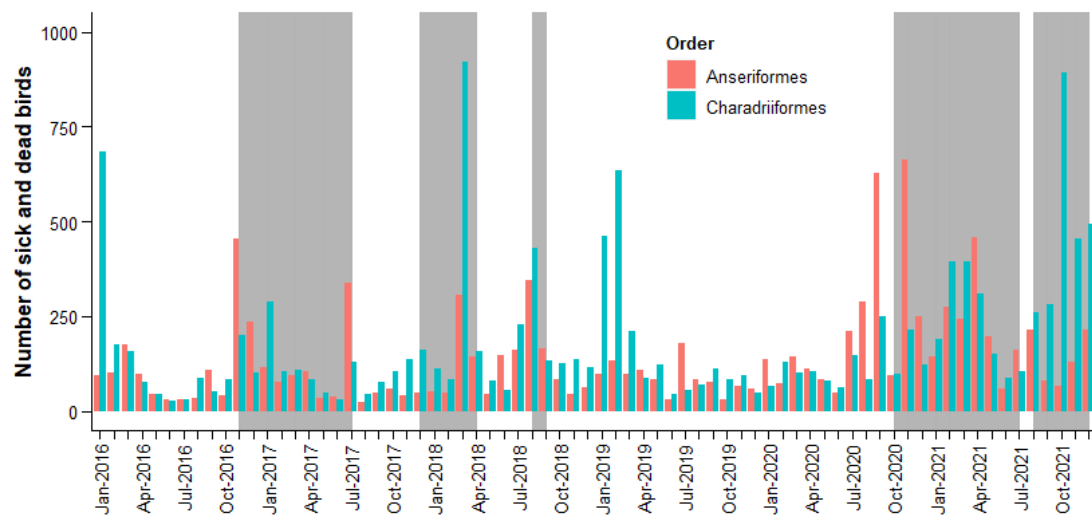

**Figure S2.** Temporal variation in the proportion of sick and dead birds of Anseriformes and Charadriiformes by month and the periods of officially reported AIV outbreaks (light grey bars).
